# Supplementary material
Source: PubMed Central journal article supplement (PMC55822)
Supplement: nar_29_15_3270__1.pdf [file nar_29_15_3270__1.pdf]

## SUPPLEMENTARY MATERIAL

Table S1.

| Column Number | Contents                                                                                                                                                    |
|---------------|-------------------------------------------------------------------------------------------------------------------------------------------------------------|
| <b>1</b>      | Residue number                                                                                                                                              |
| <b>2</b>      | hRPA70 <sub>1-168</sub> amide <sup>1</sup> H chemical shifts for M1-A138 and hRPA70 <sub>182-291</sub> amide <sup>1</sup> H chemical shifts for S182-D291   |
| <b>3</b>      | hRPA70 <sub>1-168</sub> amide <sup>15</sup> N chemical shifts for M1-A138 and hRPA70 <sub>182-291</sub> amide <sup>15</sup> N chemical shifts for S182-D291 |
| <b>4</b>      | hRPA70 <sub>1-168</sub> + dT <sub>10</sub> amide <sup>1</sup> H chemical shifts for M1-A138                                                                 |
| <b>5</b>      | hRPA70 <sub>1-168</sub> + dT <sub>10</sub> amide <sup>15</sup> N chemical shifts for M1-A138                                                                |
| <b>6</b>      | hRPA70 <sub>1-326</sub> amide <sup>1</sup> H chemical shifts for M1-A138 and S182-D291                                                                      |
| <b>7</b>      | hRPA70 <sub>1-326</sub> amide <sup>15</sup> N chemical shifts for M1-A138 and S182-D291                                                                     |
| <b>8</b>      | hRPA70 <sub>1-326</sub> + dT <sub>8</sub> amide <sup>1</sup> H chemical shifts for M1-A138 and S182-D291                                                    |
| <b>9</b>      | hRPA70 <sub>1-326</sub> + dT <sub>8</sub> amide <sup>15</sup> N chemical shifts for M1-A138 and S182-D291                                                   |
| <b>10</b>     | hRPA70 <sub>1-326</sub> + 9mer amide <sup>1</sup> H chemical shifts for M1-A138 and S182-D291                                                               |
| <b>11</b>     | hRPA70 <sub>1-326</sub> + 9mer amide <sup>15</sup> N chemical shifts for M1-A138 and S182-D291                                                              |
| <b>12</b>     | hRPA70 <sub>1-326</sub> + dT <sub>12</sub> amide <sup>1</sup> H chemical shifts for M1-A138 and S182-D291                                                   |
| <b>13</b>     | hRPA70 <sub>1-326</sub> + dT <sub>12</sub> amide <sup>15</sup> N chemical shifts for M1-A138 and S182-D291                                                  |
| <b>14</b>     | hRPA70 <sub>1-326</sub> C <sub>α</sub> chemical shifts for M1-A138 and S182-D291                                                                            |
| <b>15</b>     | hRPA70 <sub>1-326</sub> C <sub>β</sub> chemical shifts for M1-A138 and S182-D291                                                                            |

Table S2.

| 1   | 2     | 3      | 4      | 5      | 6     | 7      | 8     | 9      | 10    | 11     | 12     | 13     | 14      | 15     |
|-----|-------|--------|--------|--------|-------|--------|-------|--------|-------|--------|--------|--------|---------|--------|
| Res | d169- | d169-N | d169-H | d169-N | d327- | d327-N | dt8-H | dt8-N  | 9mer- | 9mer-N | dt12-H | dt12-N | alpha C | beta C |
| M1  |       |        |        |        |       |        |       |        |       |        |        |        |         |        |
| V2  |       |        |        |        |       |        |       |        |       |        |        |        |         |        |
| G3  |       |        |        |        | 8.52  | 112.52 | 8.52  | 112.58 | 8.5   | 112.61 | 8.5    | 112.64 | 45.45   |        |
| Q4  | 8.05  | 118.85 | 8.06   | 118.78 | 8.05  | 118.77 | 8.05  | 118.83 | 8.05  | 118.84 | 8.05   | 118.87 | 56.06   | 30.26  |
| L5  | 8.1   | 118.79 | 8.12   | 118.79 | 8.11  | 118.77 | 8.12  | 118.81 | 8.11  | 118.81 | 8.11   | 118.84 | 54.11   | 42.33  |
| S6  | 9.12  | 118.33 | 9.12   | 118.32 | 9.12  | 118.31 | 9.12  | 118.34 | 9.12  | 118.33 | 9.12   | 118.36 | 56.08   | 61.35  |
| E7  | 7.85  | 126.86 | 7.85   | 126.79 | 7.85  | 126.83 | 7.86  | 126.85 | 7.86  | 126.82 | 7.85   | 126.84 | 58.73   | 30.02  |
| G8  |       |        |        |        |       |        |       |        |       |        |        |        |         |        |
| A9  | 8.65  | 126.09 | 8.65   | 126.09 | 8.65  | 126.11 | 8.65  | 126.11 | 8.65  | 126.11 | 8.64   | 126.09 | 55.09   | 20.41  |
| I10 | 8.98  | 117.2  | 8.97   | 117.2  | 8.97  | 117.26 | 8.97  | 117.23 | 8.98  | 117.24 | 8.96   | 117.26 | 66.19   | 36.21  |
| A11 | 8.5   | 122.3  | 8.5    | 122.3  | 8.5   | 122.3  | 8.5   | 122.3  |       |        | 8.48   | 122.29 | 55.2    | 17.99  |
| A12 | 7.89  | 120.2  | 7.89   | 120.16 | 7.9   | 120.15 | 7.9   | 120.19 | 7.9   | 120.19 | 7.89   | 120.2  | 55.6    | 18.06  |
| I13 | 8.36  | 119.5  | 8.36   | 119.5  | 8.36  | 119.5  | 8.36  | 119.5  | 8.36  | 119.5  | 8.35   | 119.6  | 66.15   | 39.17  |
| M14 | 7.96  | 114.71 | 7.96   | 114.71 | 7.96  | 114.75 | 7.96  | 114.76 | 7.96  | 114.76 | 7.95   | 114.79 | 56.02   | 32.27  |
| Q15 | 8.77  | 117.84 | 8.77   | 117.82 | 8.77  | 117.81 | 8.77  | 117.82 | 8.77  | 117.82 | 8.76   | 117.84 | 57.52   | 29.51  |
| K16 | 7.7   | 116.1  | 7.72   | 116    | 7.72  | 115.9  | 7.72  | 115.9  | 7.73  | 115.98 | 7.71   | 115.98 | 56.32   | 33.41  |
| G17 | 7.74  | 108.99 | 7.75   | 109    | 7.75  | 109    | 7.75  | 108.99 | 7.76  | 108.99 | 7.75   | 109.04 | 46.45   |        |
| D18 | 7.47  | 119.5  | 7.47   | 119.4  | 7.46  | 119.41 | 7.46  | 119.4  | 7.46  | 119.4  | 7.45   | 119.4  | 54.58   | 41.59  |
| T19 | 7.96  | 112.99 | 7.96   | 113.02 | 7.96  | 112.89 | 7.96  | 112.92 | 7.96  | 112.94 | 7.95   | 112.95 | 61.11   | 68.67  |
| N20 | 8.76  | 121.7  | 8.76   | 121.7  | 8.77  | 121.74 | 8.76  | 121.76 | 8.77  | 121.72 | 8.75   | 121.72 | 53.65   | 38.92  |
| I21 | 7.22  | 115.56 | 7.22   | 115.56 | 7.22  | 115.39 | 7.22  | 115.42 | 7.22  | 115.41 | 7.22   | 115.48 | 61.19   | 40.65  |
| K22 | 8.38  | 122.46 | 8.38   | 122.42 | 8.37  | 122.39 | 8.38  | 122.39 | 8.37  | 122.38 | 8.36   | 122.4  | 53.17   | 32.92  |
| P23 |       |        |        |        |       |        |       |        |       |        |        |        |         |        |
| I24 | 9.11  | 121.82 | 9.11   | 121.77 | 9.11  | 121.81 | 9.11  | 121.79 | 9.11  | 121.82 | 9.1    | 121.81 | 61.35   | 37.8   |
| L25 | 8.62  | 123.72 | 8.62   | 123.73 | 8.62  | 123.71 | 8.63  | 123.78 | 8.62  | 123.75 | 8.61   | 123.82 | 52.7    | 47.86  |
| Q26 | 9.43  | 120.14 | 9.42   | 120.09 | 9.42  | 120.11 | 9.42  | 120.15 | 9.42  | 120.13 | 9.41   | 120.19 | 53.46   | 32.7   |
| V27 | 8.8   | 127.5  | 8.79   | 127.51 | 8.79  | 127.48 | 8.79  | 127.57 | 8.8   | 127.56 | 8.78   | 127.55 | 63.02   | 32.21  |
| I28 | 9.41  | 128.96 | 9.41   | 128.87 | 9.4   | 128.91 | 9.41  | 128.94 | 9.41  | 128.9  | 9.39   | 128.9  | 60.4    | 36.28  |
| N29 | 7.8   | 114.82 | 7.8    | 114.76 | 7.8   | 114.91 | 7.79  | 114.87 | 7.8   | 114.91 | 7.8    | 114.85 | 53.19   | 42.56  |
| I30 | 8.31  | 121.19 | 8.3    | 121.32 | 8.28  | 121.23 | 8.3   | 121.4  | 8.28  | 121.28 | 8.3    | 121.4  | 61.2    | 41.16  |
| R31 |       |        |        |        |       |        |       |        |       |        |        |        |         |        |
| P32 |       |        |        |        |       |        |       |        |       |        |        |        | 62.1    | 32.43  |
| I33 | 9.1   | 123.8  | 9.06   | 123.5  | 9.09  | 123.54 | 9.07  | 123.58 | 9.08  | 123.63 | 9.06   | 123.57 | 60.4    | 39.18  |
| T34 | 8.36  | 119.5  | 8.4    | 119.25 | 8.36  | 119.5  | 8.38  | 119.2  | 8.36  | 119.4  | 8.4    | 119.1  | 60      | 70.2   |
| T35 | 8.41  | 116.9  | 8.35   | 117    | 8.41  | 116.9  | 8.35  | 116.94 | 8.39  | 117    | 8.33   | 116.9  |         |        |
| G36 |       |        |        |        |       |        |       |        |       |        |        |        |         |        |
| N37 |       |        |        |        |       |        |       |        |       |        |        |        |         |        |
| S38 |       |        |        |        |       |        |       |        |       |        |        |        |         |        |
| P39 |       |        |        |        |       |        |       |        |       |        |        |        |         |        |
| P40 |       |        |        |        |       |        |       |        |       |        |        |        |         |        |
| R41 | 7.66  | 118.44 | 7.65   | 118.69 | 7.66  | 118.46 | 7.67  | 118.75 | 7.66  | 118.52 | 7.66   | 118.85 | 53.17   | 32.86  |
| Y42 | 9.27  | 120.35 | 9.37   | 120.44 | 9.28  | 120.35 | 9.37  | 120.44 | 9.3   | 120.45 | 9.4    | 120.47 | 56.04   | 41.56  |
| R43 | 8.9   | 124.56 | 8.92   | 124.32 | 8.9   | 124.52 | 8.91  | 124.43 | 8.89  | 124.49 | 8.91   | 124.34 |         |        |
| L44 |       |        |        |        |       |        |       |        |       |        |        |        |         |        |
| L45 | 8.14  | 124.1  | 8.15   | 124    |       |        |       |        |       |        |        |        |         |        |
| M46 | 8.27  | 122.68 | 8.26   | 122.73 | 8.26  | 122.63 | 8.27  | 122.75 | 8.26  | 122.68 | 8.26   | 122.86 | 53.65   | 36.78  |
| S47 | 8.95  | 112.76 | 8.94   | 112.64 | 8.94  | 112.69 | 8.94  | 112.65 | 8.94  | 112.69 | 8.93   | 112.69 | 54.13   | 66.66  |
| D48 | 8.8   | 127.51 | 8.79   | 127.47 | 8.8   | 127.46 | 8.79  | 127.56 | 8.79  | 127.52 | 8.78   | 127.55 | 52.91   | 42.34  |
| G49 | 8.87  | 107.5  | 8.89   | 107.5  | 8.88  | 107.49 | 8.89  | 107.5  | 8.9   | 107.53 | 8.89   | 107.58 | 45.41   |        |
| L50 |       |        |        |        | 8.48  | 122.05 | 8.49  | 122.05 | 8.48  | 122.05 | 8.47   | 122.04 | 56.5    | 44.49  |
| N51 | 10.23 | 118.95 | 10.23  | 118.95 | 10.24 | 118.95 | 10.24 | 118.96 | 10.24 | 118.96 | 10.23  | 119    | 52.2    | 45.46  |
| T52 | 7.68  | 106.26 | 7.68   | 106    | 7.68  | 105.97 | 7.69  | 106.02 | 7.69  | 106.04 | 7.68   | 106.11 | 59.23   | 71.11  |

Table S2. Continued

|      |      |        |      |        |      |        |      |        |      |        |      |        |       |       |
|------|------|--------|------|--------|------|--------|------|--------|------|--------|------|--------|-------|-------|
| L53  | 8.5  | 120.13 | 8.49 | 120    | 8.49 | 120.07 | 8.49 | 120    |      |        | 8.48 | 119.98 | 55.54 | 46.87 |
| S54  | 9    | 121.4  | 9    | 121.34 | 9    | 121.4  | 9.04 | 121.26 |      |        | 9.04 | 121.26 |       |       |
| S55  | 6.91 | 116.14 | 6.91 | 116.59 | 6.91 | 116.59 | 6.92 | 116.77 | 6.92 | 116.46 | 6.91 | 116.79 | 62.61 | 57.01 |
| F56  | 7.19 | 117.71 | 7.2  | 117.48 | 7.2  | 117.53 | 7.2  | 117.46 | 7.2  | 117.56 | 7.2  | 117.47 | 57.03 | 41.52 |
| M57  | 9.44 | 121.19 | 9.42 | 121.11 | 9.39 | 120.97 | 9.4  | 121.05 | 9.4  | 121.07 | 9.39 | 121.09 | 52.99 | 35.25 |
| L58  |      |        |      |        |      |        | 8.37 | 123.75 |      |        |      |        | 54.61 | 43.45 |
| A59  | 8.55 | 131.51 | 8.51 | 131.34 | 8.53 | 131.21 | 8.5  | 131.23 | 8.52 | 131.22 | 8.48 | 131.21 | 53.65 | 19.43 |
| T60  | 8.5  | 116.03 | 8.61 | 116.19 | 8.48 | 116.14 | 8.61 | 116.19 | 8.57 | 116.16 | 8.65 | 116.25 |       |       |
| Q61  | 9    | 120.74 | 9.08 | 120.7  | 9.01 | 120.86 | 9.07 | 120.72 |      |        | 9.11 | 120.73 | 58.47 | 27.65 |
| L62  | 8.07 | 117.61 | 8.11 | 117.6  | 8.08 | 117.56 | 8.11 | 117.64 | 8.08 | 117.61 | 8.13 | 117.69 | 54.14 | 42.13 |
| N63  | 7.83 | 122.37 | 7.83 | 122.37 | 7.83 | 122.43 | 7.84 | 122.41 | 7.84 | 122.43 | 7.83 | 122.44 | 57.46 | 35.8  |
| P64  |      |        |      |        |      |        |      |        |      |        |      |        |       |       |
| L65  | 7.95 | 113.38 | 7.97 | 113.43 | 7.95 | 113.43 | 7.98 | 113.48 | 7.96 | 113.5  | 7.98 | 113.53 | 58.26 | 42.57 |
| V66  | 7.42 | 118.88 | 7.42 | 118.9  | 7.42 | 118.85 | 7.43 | 118.94 | 7.42 | 118.92 | 7.43 | 119    | 64.76 | 32.66 |
| E67  | 7.85 | 122.24 | 7.85 | 122    |      |        | 7.84 | 122.41 |      |        | 7.83 | 122.44 |       |       |
| E68  | 8.32 | 114.92 | 8.32 | 114.86 |      |        | 8.31 | 114.96 | 8.32 | 114.97 | 8.31 | 114.98 | 55.81 | 29.4  |
| E69  | 7.66 | 112.97 | 7.7  | 112.92 |      |        | 7.67 | 113.03 |      |        |      |        | 57.95 | 26.66 |
| Q70  | 7.83 | 116.76 | 7.82 | 116.62 | 7.83 | 116.59 | 7.83 | 116.63 | 7.83 | 116.63 | 7.82 | 116.65 | 57.74 | 29.3  |
| L71  | 7.37 | 119.91 | 7.38 | 119.92 | 7.38 | 120.01 | 7.39 | 119.97 | 7.38 | 119.97 | 7.38 | 119.97 | 53.67 | 44.49 |
| S72  | 7.26 | 117.34 | 7.26 | 117.31 | 7.27 | 117.36 | 7.27 | 117.35 | 7.27 | 117.35 | 7.26 | 117.36 | 57    | 65.26 |
| S73  | 8.69 | 118.45 | 8.7  | 118.33 |      |        | 8.71 | 118.47 | 8.7  | 118.39 | 8.7  | 118.38 |       |       |
| N74  | 8.85 | 114.87 | 8.86 | 114.81 | 8.85 | 114.81 | 8.87 | 114.83 | 8.87 | 114.83 | 8.86 | 114.89 | 56.07 | 36.28 |
| C75  | 8.18 | 117.59 | 8.18 | 117.56 | 8.18 | 117.55 | 8.19 | 117.6  | 8.19 | 117.57 | 8.17 | 117.66 | 59    | 27.68 |
| V76  | 8.55 | 120.89 |      |        | 8.54 | 120.84 | 8.55 | 120.86 | 8.55 | 120.86 | 8.54 | 120.88 | 61.78 | 34.8  |
| C77  | 9.34 | 123.03 | 9.34 | 122.92 | 9.34 | 123    | 9.35 | 123    | 9.34 | 122.99 | 9.33 | 122.99 | 55.61 | 32.89 |
| Q78  | 9.13 | 120.97 | 9.13 | 120.9  | 9.13 | 120.97 | 9.13 | 120.97 | 9.13 | 120.96 | 9.12 | 120.99 | 54.18 | 30.52 |
| I79  | 8.72 | 127.3  | 8.72 | 127.16 | 8.71 | 127.16 | 8.71 | 127.17 | 8.73 | 127.21 | 8.72 | 127.26 | 59.91 | 36.62 |
| H80  | 7.98 | 124.77 | 7.99 | 124.71 | 7.98 | 124.82 | 7.99 | 124.83 | 8.01 | 124.7  | 7.98 | 124.79 | 58    | 33.4  |
| R81  | 7.88 | 117.82 | 7.88 | 117.74 | 7.89 | 117.76 | 7.89 | 117.79 | 7.89 | 117.76 | 7.88 | 117.78 | 57.03 | 34.09 |
| F82  | 8.85 | 125.41 | 8.86 | 125.34 | 8.86 | 125.42 | 8.86 | 125.37 | 8.86 | 125.39 | 8.84 | 125.33 | 56.11 | 41.63 |
| I83  | 8.75 | 116.96 | 8.73 | 117.03 | 8.75 | 116.99 | 8.74 | 117.05 | 8.75 | 116.97 | 8.73 | 117.13 | 59.93 | 43    |
| V84  | 8.72 | 124.54 | 8.72 | 124.57 | 8.73 | 124.55 | 8.73 | 124.59 | 8.72 | 124.5  | 8.71 | 124.66 | 61.39 | 32.95 |
| N85  |      |        |      |        |      |        | 9.15 | 127.5  |      |        |      |        | 51.43 | 41.83 |
| T86  | 8.56 | 118.87 | 8.55 | 118.62 | 8.57 | 119.04 | 8.55 | 118.76 | 8.56 | 118.96 | 8.54 | 118.67 | 62.31 | 69.54 |
| L87  | 9.14 | 127.93 | 9.15 | 127.71 | 9.15 | 127.51 | 9.15 | 127.5  | 9.13 | 127.78 | 9.14 | 127.52 | 54.14 | 41.83 |
| K88  | 8.49 | 121.19 |      |        | 8.49 | 121.18 | 8.5  | 121.21 | 8.49 | 121.18 | 8.49 | 121.2  |       |       |
| D89  | 7.74 | 115.49 | 7.8  | 115.5  | 7.75 | 115.38 | 7.8  | 115.51 | 7.74 | 115.39 | 7.81 | 115.59 | 53.58 | 40.22 |
| G90  | 8.07 | 108.12 | 8.1  | 108.16 | 8.08 | 108.11 | 8.1  | 108.18 | 8.1  | 108.22 | 8.1  | 108.25 | 44.71 |       |
| R91  | 7.77 | 121.23 | 7.81 | 121.44 | 7.79 | 121.31 | 7.82 | 121.51 | 7.78 | 121.3  | 7.82 | 121.58 | 57.07 | 31.25 |
| R92  | 8.35 | 120.55 | 8.34 | 120.67 | 8.34 | 120.57 | 8.33 | 120.74 | 8.34 | 120.51 | 8.32 | 120.77 | 55.13 | 32.68 |
| V93  | 8.77 | 119.3  | 8.74 | 118.98 | 8.74 | 119.26 | 8.73 | 119    | 8.74 | 119.26 | 8.73 | 118.99 | 59.9  | 35.34 |
| V94  | 8.12 | 125.12 | 8.16 | 125.09 | 8.15 | 125.35 | 8.17 | 125.22 | 8.15 | 125.31 | 8.17 | 125.19 | 61.19 | 32.4  |
| I95  | 9.39 | 127.9  | 9.39 | 127.9  | 9.39 | 127.9  | 9.4  | 127.9  | 9.39 | 127.9  | 9.38 | 127.9  | 59.91 | 37.74 |
| L96  | 9.1  | 126.27 | 9.09 | 126.31 | 9.09 | 126.37 | 9.09 | 126.4  | 9.09 | 126.32 | 9.08 | 126.4  | 54.59 | 43.05 |
| M97  | 8.23 | 120.74 | 8.2  | 120.62 |      |        |      |        |      |        |      |        |       |       |
| E98  | 7.75 | 115.3  | 7.75 | 115.5  | 7.75 | 115.36 | 7.75 | 115.4  | 7.75 | 115.42 | 7.75 | 115.43 | 56.15 | 34.38 |
| L99  | 8.79 | 123.91 | 8.78 | 123.8  | 8.77 | 123.78 | 8.78 | 123.81 | 8.78 | 123.78 | 8.77 | 123.89 | 54.97 | 46.34 |
| E100 | 8.77 | 120.56 | 8.76 | 120.47 | 8.76 | 120.54 | 8.76 | 120.54 | 8.76 | 120.52 | 8.75 | 120.56 | 54.15 | 34.52 |
| V101 | 9.39 | 127.81 | 9.39 | 127.81 | 9.38 | 127.85 | 9.38 | 127.85 | 9.39 | 127.86 | 9.38 | 127.85 | 64.25 | 31    |
| L102 | 8.97 | 129.82 | 8.97 | 129.76 | 8.96 | 129.83 | 8.97 | 129.86 | 8.96 | 129.81 | 8.96 | 129.86 | 57.51 |       |
| K103 | 7.75 | 117.61 | 7.75 | 117.57 | 7.74 | 117.5  | 7.75 | 117.53 | 7.75 | 117.53 | 7.75 | 117.62 | 55.01 | 36.89 |
| S104 |      |        |      |        | 8.76 | 120.54 | 8.74 | 120.55 | 8.76 | 120.52 | 8.75 | 120.56 | 57.72 | 64.76 |
| A105 | 8.77 | 123.22 | 8.77 | 123.17 | 8.78 | 123.21 | 8.78 | 123.23 | 8.78 | 123.26 | 8.76 | 123.25 | 55.57 | 21.83 |
| E106 | 8.6  | 117.39 | 8.59 | 117.3  | 8.6  | 117.32 | 8.6  | 117.34 | 8.6  | 117.3  | 8.58 | 117.36 | 58.7  | 29.3  |

Table S2. Continued

|      |       |        |      |        |       |        |       |        |       |        |       |        |       |       |
|------|-------|--------|------|--------|-------|--------|-------|--------|-------|--------|-------|--------|-------|-------|
| A107 | 7.66  | 122.03 | 7.68 | 122.01 | 7.67  | 122.01 | 7.67  | 122.04 | 7.66  | 122.02 | 7.66  | 122.06 | 53.69 | 18.96 |
| V108 | 7.73  | 118.7  | 7.73 | 118.71 | 7.73  | 118.69 | 7.74  | 118.75 | 7.73  | 118.72 | 7.73  | 118.76 | 64.99 | 32.95 |
| G109 | 8.23  | 106.91 | 8.23 | 106.7  | 8.22  | 106.51 | 8.23  | 106.57 | 8.22  | 106.59 | 8.23  | 106.71 | 46.91 |       |
| V110 | 7.15  | 114.94 | 7.15 | 114.95 | 7.15  | 114.92 | 7.15  | 114.94 | 7.15  | 114.95 | 7.15  | 115.01 | 59.44 | 36.04 |
| K111 | 8.03  | 123.12 | 8.04 | 123.17 | 8.06  | 123.22 | 8.04  | 123.17 | 8.05  | 123.23 | 8.03  | 123.24 | 57.01 | 32.46 |
| I112 | 9.24  | 130.45 | 9.25 | 130.4  | 9.25  | 130.36 | 9.25  | 130.43 | 9.24  | 130.35 | 9.23  | 130.43 | 61.89 | 38.34 |
| G113 | 8.34  | 114.44 | 8.35 | 114.39 | 8.34  | 114.37 | 8.34  | 114.39 | 8.34  | 114.39 | 8.33  | 114.41 | 45.69 |       |
| N114 | 8.47  | 116.13 | 8.47 | 116.1  | 8.48  | 116.14 | 8.48  | 116.14 | 8.48  | 116.16 | 8.48  | 116.16 | 51.14 | 39.67 |
| P115 |       |        |      |        |       |        |       |        |       |        |       |        |       |       |
| V116 |       |        |      |        |       |        |       |        |       |        |       |        |       |       |
| P117 |       |        |      |        |       |        |       |        |       |        |       |        |       |       |
| Y118 | 9.15  | 126.02 | 9.13 | 125.72 | 9.14  | 125.88 | 9.13  | 125.74 | 9.13  | 125.76 | 9.1   | 125.59 | 59.87 | 39.73 |
| N119 |       |        |      |        |       |        |       |        |       |        |       |        |       |       |
| E120 |       |        |      |        |       |        |       |        |       |        |       |        |       |       |
| G121 | 8.27  | 108.81 | 8.27 | 108.78 | 8.26  | 108.71 | 8.27  | 108.76 | 8.27  | 108.81 | 8.27  | 108.84 | 45.57 |       |
| L122 | 7.98  | 121.4  | 7.98 | 121.4  | 7.96  | 121.34 | 7.97  | 121.39 | 7.97  | 121.41 | 7.95  | 121.4  | 55.35 | 42.46 |
| G123 | 8.42  | 109.8  | 8.41 | 109.6  | 8.41  | 109.58 | 8.41  | 109.59 | 8.41  | 109.61 | 8.39  | 109.58 | 45.28 |       |
| Q124 |       |        |      |        |       |        |       |        |       |        |       |        |       |       |
| P125 |       |        |      |        |       |        |       |        |       |        |       |        |       |       |
| Q126 |       |        |      |        |       |        |       |        |       |        |       |        |       |       |
| V127 |       |        |      |        |       |        |       |        |       |        |       |        |       |       |
| A128 | 8.35  | 129.61 | 8.37 | 129.63 | 8.35  | 129.57 | 8.37  | 129.63 | 8.35  | 129.54 | 8.35  | 129.58 | 50.29 | 18.41 |
| P129 |       |        |      |        |       |        |       |        |       |        |       |        |       |       |
| P130 |       |        |      |        |       |        |       |        |       |        |       |        |       |       |
| A131 | 8.3   | 125.7  | 8.32 | 125.7  |       |        |       |        |       |        |       |        |       |       |
| P132 |       |        |      |        |       |        |       |        |       |        |       |        |       |       |
| A133 |       |        |      |        |       |        |       |        |       |        |       |        |       |       |
| A134 |       |        |      |        |       |        |       |        |       |        |       |        |       |       |
| S135 |       |        |      |        |       |        |       |        |       |        |       |        |       |       |
| P136 |       |        |      |        |       |        |       |        |       |        |       |        |       |       |
| A137 |       |        |      |        |       |        |       |        |       |        |       |        |       |       |
| A138 |       |        |      |        |       |        |       |        |       |        |       |        |       |       |
| S182 | 7.97  | 115.19 |      |        | 7.99  | 115.08 | 7.99  | 115.06 | 7.99  | 115.11 | 7.99  | 115.11 | 58.4  | 63.85 |
| K183 | 8.03  | 122.09 |      |        | 8.05  | 121.85 | 8.06  | 122.14 | 8.05  | 121.94 | 8.06  | 122.09 |       |       |
| V184 | 7.88  | 121.72 |      |        | 7.83  | 121.87 | 7.83  | 121.92 | 7.84  | 121.98 | 7.83  | 121.97 |       |       |
| V185 | 9.02  | 123.2  |      |        |       |        |       |        |       |        |       |        |       |       |
| P186 |       |        |      |        |       |        |       |        |       |        |       |        |       |       |
| I187 | 10.9  | 130.88 |      |        | 10.87 | 130.8  | 10.89 | 130.7  | 10.89 | 130.62 | 10.87 | 130.63 | 66.32 |       |
| A188 | 8.83  | 119.87 |      |        | 8.81  | 119.65 | 8.84  | 119.83 | 8.83  | 119.74 | 8.83  | 119.84 | 53.71 | 18.95 |
| S189 | 7.89  | 112.83 |      |        | 7.88  | 112.63 | 7.88  | 112.7  | 7.88  | 112.7  | 7.88  | 112.76 | 58.95 | 65.14 |
| L190 | 7.34  | 122.62 |      |        | 7.33  | 122.54 | 7.37  | 122.57 | 7.36  | 122.62 | 7.36  | 122.58 | 55.67 | 41.63 |
| T191 | 7.43  | 111.58 |      |        |       |        | 7.38  | 111.8  |       |        |       |        | 58.46 | 70.25 |
| P192 |       |        |      |        |       |        |       |        |       |        |       |        |       | 31.48 |
| Y193 | 7.29  | 114.85 |      |        | 7.28  | 114.71 | 7.31  | 114.61 | 7.31  | 114.61 | 7.33  | 114.56 | 57.9  | 37.68 |
| Q194 | 7.26  | 119.97 |      |        | 7.24  | 119.79 | 7.29  | 119.89 | 7.28  | 119.87 | 7.31  | 119.81 | 55.54 | 30.49 |
| S195 |       |        |      |        |       |        |       |        |       |        |       |        |       |       |
| K196 |       |        |      |        |       |        |       |        |       |        |       |        |       |       |
| W197 | 7     | 118.71 |      |        | 6.94  | 118.42 | 6.96  | 118.45 | 6.97  | 118.4  | 6.93  | 118.46 | 55.44 | 31.92 |
| T198 | 7.83  | 117.34 |      |        | 7.87  | 117.32 | 7.87  | 117.27 | 7.88  | 117.38 | 7.87  | 117.28 | 63.24 | 72.34 |
| I199 | 9.43  | 118.43 |      |        | 9.4   | 118.4  | 9.41  | 118.37 | 9.42  | 118.39 | 9.41  | 118.37 |       |       |
| C200 | 10.01 | 130.27 |      |        | 9.82  | 126.24 | 9.82  | 126.23 | 9.82  | 126.24 | 9.81  | 126.21 |       |       |
| A201 | 9.25  | 127.71 |      |        |       |        |       |        |       |        |       |        |       |       |
| R202 | 9.1   | 122.89 |      |        |       |        |       |        |       |        |       |        | 54.94 | 32.56 |
| V203 | 8.48  | 126.7  |      |        | 8.49  | 126.77 | 8.48  | 126.74 | 8.49  | 126.72 | 8.47  | 126.77 | 61.39 | 32.32 |

Table S2. Continued

|      |      |        |  |  |      |        |      |        |      |        |      |        |       |       |
|------|------|--------|--|--|------|--------|------|--------|------|--------|------|--------|-------|-------|
| T204 | 9.12 | 121.22 |  |  | 9.13 | 121.2  | 9.15 | 121.4  | 9.14 | 121.3  | 9.14 | 121.35 | 62.31 | 68.94 |
| N205 | 7.59 | 118.3  |  |  | 7.58 | 118.05 | 7.6  | 118.27 | 7.59 | 118.19 | 7.59 | 118.3  | 53.63 | 42.31 |
| K206 | 8.27 | 124.87 |  |  |      |        |      |        |      |        |      |        |       |       |
| S207 | 9.44 | 125.16 |  |  | 9.42 | 125.05 | 9.44 | 125.11 | 9.43 | 124.98 | 9.43 | 125.13 | 58.98 | 66.18 |
| Q208 | 8.28 | 115.32 |  |  | 8.26 | 115.15 | 8.3  | 115.22 | 8.27 | 115.25 | 8.29 | 115.26 | 55.59 | 29.77 |
| I209 | 8.53 | 123.83 |  |  | 8.5  | 123.84 | 8.47 | 123.34 | 8.46 | 123.38 | 8.45 | 123.31 | 63.28 | 38.18 |
| R210 | 9.28 | 130.32 |  |  | 9.27 | 130.15 | 9.32 | 130.75 | 9.35 | 130.63 | 9.3  | 130.74 | 54.29 | 32.79 |
| T211 | 8.43 | 113.89 |  |  | 8.4  | 113.64 | 8.43 | 113.99 | 8.35 | 113.44 | 8.42 | 114.11 | 60    | 71.04 |
| W212 | 8.24 | 120.64 |  |  |      |        |      |        |      |        |      |        |       |       |
| S213 | 8.47 | 114.52 |  |  |      |        | 8.58 | 114.44 |      |        |      |        | 58    | 63.94 |
| N214 | 9.05 | 123.48 |  |  |      |        |      |        |      |        |      |        |       |       |
| S215 |      |        |  |  |      |        |      |        |      |        |      |        |       |       |
| R216 | 8.44 | 119.93 |  |  | 8.43 | 119.83 | 8.43 | 120.37 |      |        | 8.41 | 120.41 | 56.78 | 30.99 |
| G217 | 7.85 | 109.21 |  |  | 7.84 | 109.02 | 7.85 | 108.67 | 7.87 | 108.7  | 7.84 | 108.71 | 45.41 |       |
| E218 | 8.04 | 118.33 |  |  | 8.02 | 118.14 | 8.13 | 118.55 | 8.1  | 118.35 | 8.09 | 118.34 |       |       |
| G219 | 7.3  | 109.46 |  |  | 7.26 | 109.2  |      |        |      |        |      |        |       |       |
| K220 | 8    | 117.17 |  |  | 7.97 | 116.97 | 8.01 | 116.69 | 8.04 | 116.49 | 8    | 116.74 | 53.9  | 33.12 |
| L221 | 9.29 | 118.95 |  |  | 9.28 | 118.81 | 9.37 | 119.28 | 9.28 | 119.15 | 9.29 | 118.92 | 55.33 | 44.96 |
| F222 | 8.5  | 115.66 |  |  | 8.49 | 115.53 | 8.49 | 115.28 |      |        | 8.49 | 115.34 | 57.5  | 42.26 |
| S223 | 9.15 | 115.61 |  |  | 9.11 | 115.47 | 9.07 | 115.13 | 9.04 | 115.05 | 9.06 | 115.17 | 56.56 | 67.55 |
| L224 | 9.31 | 120.61 |  |  | 9.28 | 120.48 | 9.31 | 120.36 | 9.3  | 120.37 | 9.3  | 120.34 | 53.65 | 46.46 |
| E225 | 8.05 | 120.31 |  |  | 8.02 | 120.1  | 8.07 | 119.7  | 8.05 | 119.98 | 8.06 | 119.71 | 56.62 | 31.67 |
| L226 | 8.64 | 123.67 |  |  | 8.64 | 123.67 | 8.69 | 123.42 | 8.69 | 123.72 | 8.66 | 123.43 | 53.11 | 44.42 |
| V227 | 8.97 | 118.48 |  |  | 8.96 | 118.41 | 8.98 | 118.44 | 8.96 | 118.28 | 8.98 | 118.42 | 60.41 | 36.69 |
| D228 | 8.95 | 127.49 |  |  | 8.9  | 126.98 | 8.92 | 127.02 | 8.92 | 126.72 | 8.91 | 127.04 | 53.15 | 42.07 |
| E229 | 8.78 | 115.94 |  |  | 8.78 | 115.86 | 8.86 | 115.98 | 8.85 | 115.92 | 8.86 | 115.92 | 59.22 | 29.45 |
| S230 | 9.24 | 117.07 |  |  | 9.28 | 117    | 9.27 | 116.98 | 9.26 | 116.91 | 9.26 | 117.01 | 58.92 | 65.5  |
| G231 | 7.72 | 112.35 |  |  |      |        |      |        |      |        |      |        |       |       |
| E232 | 8.13 | 115.55 |  |  | 8.1  | 115.33 | 8.15 | 115.06 | 8.15 | 115.13 | 8.14 | 115.12 |       |       |
| I233 | 8.94 | 119.48 |  |  | 8.89 | 119.21 | 8.87 | 118.82 | 8.88 | 118.87 | 8.87 | 118.87 | 61.52 | 41.83 |
| R234 | 9.01 | 127.92 |  |  |      |        |      |        |      |        |      |        | 54.91 |       |
| A235 | 8.95 | 127.49 |  |  | 8.93 | 127.27 | 8.97 | 127.36 | 8.89 | 127.14 | 8.96 | 127.3  | 49.31 | 23.77 |
| T236 | 8.01 | 116.02 |  |  | 7.98 | 115.86 | 7.94 | 115.83 | 7.94 | 116.49 | 7.92 | 115.9  | 61.91 | 71.43 |
| A237 | 8.01 | 127.89 |  |  | 8    | 127.78 | 8.04 | 127.72 | 7.91 | 127.77 | 8.03 | 127.69 | 49.76 | 22.27 |
| F238 | 9.36 | 117.2  |  |  | 9.33 | 117    | 9.41 | 116.69 | 9.26 | 116.6  | 9.4  | 116.68 | 56.84 | 42.95 |
| N239 | 9.3  | 119.74 |  |  | 9.28 | 119.6  | 9.3  | 118.88 | 9.22 | 119.54 | 9.37 | 119.53 | 56.99 | 37.95 |
| E240 | 9.62 | 125.03 |  |  | 9.58 | 124.93 |      |        |      |        |      |        |       |       |
| Q241 | 8.61 | 116.57 |  |  | 8.59 | 116.42 | 8.62 | 116.2  | 8.59 | 116.16 | 8.65 | 116.31 | 62.05 | 33.1  |
| V242 | 9.09 | 122.76 |  |  | 9.09 | 122.47 | 9.11 | 122.57 | 9.08 | 122.51 | 9.1  | 122.57 | 64.95 | 36.3  |
| D243 | 7.09 | 116.98 |  |  | 7.08 | 116.82 | 7.02 | 116.97 | 7.02 | 116.9  | 7.01 | 117.03 | 57.01 | 40.18 |
| K244 | 7.14 | 114.7  |  |  | 7.12 | 114.56 | 7.21 | 114.52 | 7.15 | 114.58 | 7.21 | 114.58 | 58.49 | 33.9  |
| F245 | 7.7  | 110.97 |  |  | 7.75 | 110.78 | 7.72 | 110.76 | 7.7  | 110.81 | 7.7  | 110.87 | 60.59 | 40.08 |
| F246 | 9.09 | 122.62 |  |  | 9.09 | 122.47 | 9.11 | 122.57 | 9.05 | 122.49 | 9.1  | 122.57 | 55.58 | 43.04 |
| P247 |      |        |  |  |      |        |      |        |      |        |      |        | 64.66 | 31.55 |
| L248 | 6.94 | 115.46 |  |  | 6.93 | 115.28 | 6.91 | 115.35 | 6.92 | 115.3  | 6.9  | 115.37 | 55.53 | 44.24 |
| I249 | 6.7  | 115.97 |  |  | 6.69 | 115.87 | 6.72 | 116.01 | 6.69 | 115.96 | 6.72 | 116.08 | 60.9  | 40.17 |
| E250 | 8.88 | 128.61 |  |  | 8.84 | 128.45 | 8.83 | 128.46 | 8.83 | 128.4  | 8.82 | 128.48 | 54.16 | 32.93 |
| V251 | 8.37 | 120.55 |  |  |      |        | 8.39 | 120.56 |      |        |      |        | 64.25 | 32.23 |
| N252 | 9.46 | 118.94 |  |  | 9.42 | 118.79 | 9.44 | 118.84 | 9.43 | 118.86 | 9.44 | 118.92 | 55.57 | 37.77 |
| K253 | 7.52 | 119.14 |  |  | 7.52 | 119.48 | 7.54 | 119.41 | 7.52 | 119.41 | 7.53 | 119.46 | 55.59 | 33.54 |
| V254 | 7.79 | 120.43 |  |  |      |        |      |        |      |        |      |        |       |       |
| Y255 | 8.68 | 123.27 |  |  |      |        |      |        |      |        |      |        |       |       |
| Y256 | 9.21 | 117.61 |  |  | 9.17 | 117.36 | 9.19 | 117.44 | 9.2  | 117.48 | 9.18 | 117.46 | 62.02 | 33.12 |
| F257 | 9.01 | 121.98 |  |  | 9.02 | 121.82 | 9.04 | 121.85 | 9.04 | 121.81 | 9.02 | 121.88 | 57.92 | 32.87 |

Table S2. Continued

|      |      |        |  |  |      |        |      |        |      |        |      |        |       |       |
|------|------|--------|--|--|------|--------|------|--------|------|--------|------|--------|-------|-------|
| S258 | 8.68 | 115.71 |  |  | 8.65 | 115.44 | 8.66 | 115.39 | 8.64 | 115.31 | 8.65 | 115.47 |       |       |
| L259 |      |        |  |  |      |        |      |        |      |        |      |        |       |       |
| G260 |      |        |  |  | 6.44 | 105.08 | 6.44 | 105.08 | 6.43 | 104.58 | 6.43 | 105.19 | 44.4  |       |
| T261 | 8.78 | 115.94 |  |  | 8.78 | 115.86 | 8.87 | 117.13 |      |        |      |        | 62.03 | 70.55 |
| L262 | 9.14 | 128.53 |  |  | 9.12 | 128.46 | 9.04 | 128.27 | 9.03 | 128.46 | 9.03 | 128.26 | 53.67 | 44.82 |
| K263 | 8.72 | 118.63 |  |  | 8.71 | 118.5  | 8.81 | 118.17 | 8.75 | 118.65 | 8.79 | 118.17 | 53.72 | 35.78 |
| I264 | 8.55 | 122.45 |  |  | 8.55 | 122.45 | 8.48 | 121.8  |      |        |      |        | 62.36 | 37.72 |
| A265 | 8.69 | 130.83 |  |  | 8.68 | 130.71 | 8.75 | 130.34 | 8.73 | 130.61 | 8.72 | 130.3  | 52.2  | 19.45 |
| N266 | 8.44 | 119.93 |  |  | 8.43 | 119.83 | 8.4  | 119.93 |      |        | 8.4  | 120    | 52.19 | 37.85 |
| K267 | 8.46 | 123.75 |  |  | 8.49 | 123.85 | 8.45 | 123.98 |      |        | 8.43 | 123.9  | 58    | 31.48 |
| Q268 | 8.16 | 119.08 |  |  | 8.16 | 119.08 |      |        |      |        |      |        | 56.17 | 32.53 |
| F269 | 7.96 | 117.51 |  |  | 8.01 | 118.16 | 7.02 | 116.96 | 7.04 | 116.82 | 7.01 | 117.03 | 57.1  | 40.47 |
| T270 | 7.64 | 113.43 |  |  | 7.64 | 113.43 | 7.29 | 112.75 | 7.3  | 112.7  | 7.28 | 112.78 | 60.85 | 69.47 |
| A271 | 8.32 | 126.09 |  |  | 8.32 | 126.09 | 8.44 | 127.73 | 8.43 | 127.24 | 8.44 | 127.71 | 51.46 | 19.21 |
| V272 | 7.91 | 119.71 |  |  | 7.9  | 120.16 | 8.14 | 121.94 | 8.15 | 121.96 | 8.13 | 121.93 | 63.34 |       |
| K273 | 9.15 | 128.86 |  |  | 9.16 | 128.94 | 9.46 | 131.03 | 9.45 | 130.6  | 9.43 | 130.92 | 55.87 | 30.54 |
| N274 | 7.56 | 121.99 |  |  | 7.51 | 121.88 | 7.42 | 122.88 | 7.41 | 122.73 | 7.41 | 122.85 | 53.65 | 40.14 |
| D275 | 8.53 | 125.6  |  |  | 8.52 | 125.5  | 8.57 | 126.56 | 8.56 | 126.24 | 8.56 | 126.5  | 56.2  | 40.62 |
| Y276 | 9.08 | 119.49 |  |  | 9.07 | 119.38 | 9.21 | 120.09 | 9.21 | 119.93 | 9.18 | 120.09 | 55.98 | 41.33 |
| E277 | 9.04 | 116.12 |  |  | 9.01 | 115.96 | 9.08 | 116.03 | 9.12 | 116.12 | 9.08 | 116.13 | 54.7  | 34.64 |
| M278 | 8.93 | 121.05 |  |  | 8.91 | 120.84 | 8.89 | 119.85 | 8.9  | 120.51 | 8.88 | 119.82 | 54    | 37.14 |
| T279 | 9.67 | 122.21 |  |  | 9.66 | 121.94 | 9.72 | 121.38 | 9.72 | 120.89 | 9.71 | 121.41 | 60.38 | 70.92 |
| F280 |      |        |  |  |      |        |      |        |      |        |      |        |       |       |
| N281 |      |        |  |  |      |        |      |        |      |        |      |        |       |       |
| N282 |      |        |  |  |      |        |      |        |      |        |      |        |       |       |
| E283 | 8.87 | 117.61 |  |  | 8.87 | 117.47 | 8.93 | 117.64 | 8.92 | 117.79 | 8.91 | 117.64 | 55.8  | 31    |
| T284 | 7.52 | 119.14 |  |  | 7.52 | 118.77 | 7.54 | 118.81 | 7.54 | 118.84 | 7.53 | 118.88 | 64.01 | 69.7  |
| S285 | 8.8  | 121.21 |  |  | 8.75 | 121.03 | 8.75 | 121.04 | 8.74 | 121.02 | 8.76 | 121.04 |       |       |
| V286 | 8.28 | 123.62 |  |  |      |        |      |        |      |        |      |        |       |       |
| M287 | 8.75 | 125.75 |  |  | 8.73 | 125.6  | 8.74 | 125.53 | 8.74 | 125.56 | 8.73 | 125.55 |       |       |
| P288 |      |        |  |  |      |        |      |        |      |        |      |        |       |       |
| C289 | 7.87 | 122.28 |  |  |      |        |      |        |      |        |      |        |       |       |
| E290 | 8.73 | 127.59 |  |  |      |        |      |        |      |        |      |        |       |       |
| D291 | 7.89 | 127.12 |  |  | 7.85 | 126.85 | 7.86 | 126.84 | 7.86 | 126.82 | 7.85 | 126.85 |       |       |
